# Supplementary material for: Parental Knowledge, Attitude, and Practices on Antibiotic Use for Childhood Upper Respiratory Tract Infections during COVID-19 Pandemic in Greece
Source: MDPI journal article supplement (doi:10.3390/antibiotics10070802), 2021-07-01
Supplement: s1 [file s1]

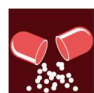

Table S1. Association of demographic characteristics with knowledge statements about URTIs.

| Statement                                                                | Correct Answer | Incorrect Answer | Gender | Age                     | Nationality          | Education                  | Occupation             | Insurance        | Income          | Number of Children | Age of Child            | Child's Chronic Disease | Access to Health System |
|--------------------------------------------------------------------------|----------------|------------------|--------|-------------------------|----------------------|----------------------------|------------------------|------------------|-----------------|--------------------|-------------------------|-------------------------|-------------------------|
|                                                                          |                |                  |        |                         |                      |                            |                        |                  |                 |                    |                         |                         |                         |
| Most infections with cold or flu symptoms are caused by viruses.         | 81.6%          | 17.4%            | NS *   | NS                      | 0.000<br>I **: Other | 0.000<br>I: Primary school | 0.035<br>I: Part-time  | 0.000<br>I: None | 0.005<br>I: Low | NS                 | NS                      | NS                      | 0.008<br>I: Low         |
| Antibiotics are needed for bacterial infections.                         | 48.5%          | 50.7%            | NS     | NS                      | 0.029<br>I: Other    | 0.000<br>I: Primary school | 0.001<br>I: Unemployed | 0.022<br>I: None | 0.000<br>I: Low | 0.008<br>I: 4      | 0.000<br>I: 12–16 years | NS                      | 0.015<br>I: Good        |
| Flu and common cold need only symptomatic treatment.                     | 69%            | 28.7%            | NS     | 0.000<br>I: 18–30 years | 0.003<br>I: Other    | NS                         | 0.002<br>I: Students   | NS               | 0.005<br>I: Low | 0.016<br>I: 1      | NS                      | NS                      | 0.042<br>I: Very low    |
| Antibiotic use may protect from complications of common cold or the flu. | 48.2%          | 50.9%            | NS     | NS                      | 0.010<br>I: Other    | 0.000<br>I: Primary School | 0.035<br>I: Unemployed | NS               | 0.001<br>I: Low | 0.049<br>I: 2      | NS                      | NS                      | 0.005<br>I: Very low    |
| Antibiotics are always needed for my child's flu or common cold.         | 79.1%          | 19.9%            | NS     | 0.000<br>I: 18–30 years | 0.000<br>I: Other    | 0.000<br>I: Primary School | 0.004<br>I: Unemployed | 0.000<br>I: None | 0.000<br>I: Low | 0.037<br>I: 4      | NS                      | NS                      | NS                      |

|                                                                                                         |       |       |    |                       |                   |                            |                       |                  |                 |               |                         |    |                 |
|---------------------------------------------------------------------------------------------------------|-------|-------|----|-----------------------|-------------------|----------------------------|-----------------------|------------------|-----------------|---------------|-------------------------|----|-----------------|
| Antibiotics are always needed for my child's tonsillitis.                                               | 19%   | 79.9% | NS | 0.028<br>I: >60 years | NS                | 0.002<br>I: Primary School | NS                    | 0.001<br>I: None | 0.037<br>I: Low | 0.001<br>I: 5 | 0.012<br>I: 12–16 years | NS | NS              |
| Antibiotics are always needed for my child's otitis.                                                    | 17.5% | 81.1% | NS | NS                    | NS                | 0.003<br>I: Primary School | 0.004<br>I: Students  | 0.000<br>I: None | 0.000<br>I: Low | 0.013<br>I: 5 | NS                      | NS | NS              |
| Imprudent use of antibiotics reduces their efficacy and may cause antibiotic resistance.                | 80.8% | 17.7% | NS | 0.000<br>I: >60 years | 0.000<br>I: Other | 0.000<br>I: High school    | 0.000<br>I: Part-time | NS               | 0.000<br>I: Low | NS            | NS                      | NS | 0.031<br>I: Low |
| My child will be sick for a longer time if it doesn't receive antibiotics for its cold or flu symptoms. | 53.6% | 45.4% | NS | NS                    | 0.000<br>I: Other | 0.001<br>I: Primary school | 0.019<br>I: Part-time | 0.011<br>I: None | 0.000<br>I: Low | NS            | NS                      | NS | NS              |

\* NS: not statistically significant. \*\* For statistically significant associations for each statement the subgroup of parents who answered incorrectly (I) in a higher percentage are noticed in parentheses.

**Table S2.** Association of demographic characteristics with attitude/practice statements about URTIs.

| <i>p</i> -value (chi-square test)                                                                                    |         |           |        |                            |                   |                            |                        |                  |                 |                    |              |                      |                 |                         |
|----------------------------------------------------------------------------------------------------------------------|---------|-----------|--------|----------------------------|-------------------|----------------------------|------------------------|------------------|-----------------|--------------------|--------------|----------------------|-----------------|-------------------------|
| Statement/Question                                                                                                   | Correct | Incorrect | Gender | Age                        | Nationality       | Education                  | Occupation             | Insurance        | Income          | Number of Children | Age of Child | Single-Parent Family | Chronic Disease | Access to Health System |
| I am more satisfied when my pediatrician prescribes antibiotics for my kid's cold or flu symptoms.                   | 69.4%   | 30%       | NS *   | 0.004<br>I **: 18–30 years | 0.000<br>I: Other | 0.000<br>I: High school    | 0.000<br>I: Unemployed | 0.000<br>I: None | 0.000<br>I: Low | 0.018<br>I: 4      | NS           | NS<br>I: Yes         | NS              | 0.032<br>I: Very low    |
| I may visit another pediatrician for a second opinion if mine doesn't prescribe antibiotics                          | 81.3%   | 18.3%     | NS     | 0.001<br>I: 18–30 years    | 0.000<br>I: Other | 0.000<br>I: Primary school | NS                     | NS               | 0.026<br>I: Low | NS                 | NS           | NS                   | NS              | 0.002<br>I: Low         |
| How often do you buy antibiotics at the pharmacy without medical prescription for your child's cold or flu symptoms? | 85%     | 14.6%     | NS     | 0.002<br>I: 51–60 years    | 0.003<br>I: Other | 0.001<br>I: Primary school | NS                     | NS               | NS              | 0.010<br>Λ: 4      | NS           | NS                   | 0.023<br>Λ: No  | NS                      |
| How often do you insist your pediatrician to prescribe antibiotics for your child's cold or flu symptoms?            | 84%     | 15.5%     | NS     | 0.000<br>I: 51–60 years    | 0.000<br>I: Other | 0.000<br>I: Primary school | NS                     | NS               | NS              | NS                 | NS           | NS                   | 0.001<br>I: Yes | NS                      |
| How often does your pediatrician recommend antibiotics over the phone?                                               | 61.4%   | 38.1%     | NS     | NS                         | NS                | 0.022<br>I: Primary school | NS                     | NS               | NS              | NS                 | NS           | NS                   | NS              | NS                      |

\* NS: not statistically significant. \*\* For statistically significant associations for each statement the subgroup of parents who answered incorrectly (I) in a higher percentage are noticed in parentheses.
